# Supplementary material for: First genomic resource for an endangered neotropical mega-herbivore: the complete mitochondrial genome of the forest-dweller (Baird’s) tapir (Tapirus bairdii)
Source: PeerJ journal article supplement (doi:10.7717/peerj.13440), 2022-06-01
Supplement: microsatellite_repeats_in_CR_english.pdf [file microsatellite_repeats_in_CR_english.pdf]

# Microsatellite Repeats Finder

| Position | Cycle | Repeats | Sequence  |
|----------|-------|---------|-----------|
| 28       | 2     | 3       | GTGTGT    |
| 56       | 2     | 3       | TTTTTT    |
| 62       | 3     | 3       | CCCCCCCC  |
| 246      | 3     | 3       | TATTATTAT |
| 525      | 2     | 3       | CACACA    |
| 556      | 2     | 3       | TTTTTT    |
| 710      | 2     | 3       | ACACAC    |
| 732      | 2     | 3       | ACACAC    |
| 754      | 2     | 3       | ACACAC    |
| 776      | 2     | 3       | ACACAC    |
| 798      | 2     | 3       | ACACAC    |
| 820      | 2     | 3       | ACACAC    |
| 839      | 2     | 3       | TATATA    |
| 861      | 2     | 3       | TATATA    |
| 883      | 2     | 3       | TATATA    |
| 905      | 2     | 3       | TATATA    |
| 927      | 2     | 3       | TATATA    |
| 952      | 2     | 3       | ACACAC    |
| 962      | 2     | 3       | ACACAC    |
| 996      | 2     | 3       | CCCCCC    |
| 1005     | 2     | 3       | CCCCCC    |
| 1189     | 2     | 4       | TTTTTTTT  |
