# Supplementary material for: First genomic resource for an endangered neotropical mega-herbivore: the complete mitochondrial genome of the forest-dweller (Baird’s) tapir (Tapirus bairdii)
Source: PeerJ journal article supplement (doi:10.7717/peerj.13440), 2022-06-01

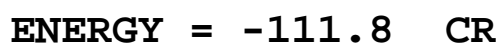

Supplement: Suppl-Mat-Fig_1.pdf [file Suppl-Mat-Fig_1.pdf]
