# Supplementary material for: First genomic resource for an endangered neotropical mega-herbivore: the complete mitochondrial genome of the forest-dweller (Baird’s) tapir (Tapirus bairdii)
Source: PeerJ journal article supplement (doi:10.7717/peerj.13440), 2022-06-01
Supplement: Suppl-Mat-Fig_2.pdf [file Suppl-Mat-Fig_2.pdf]

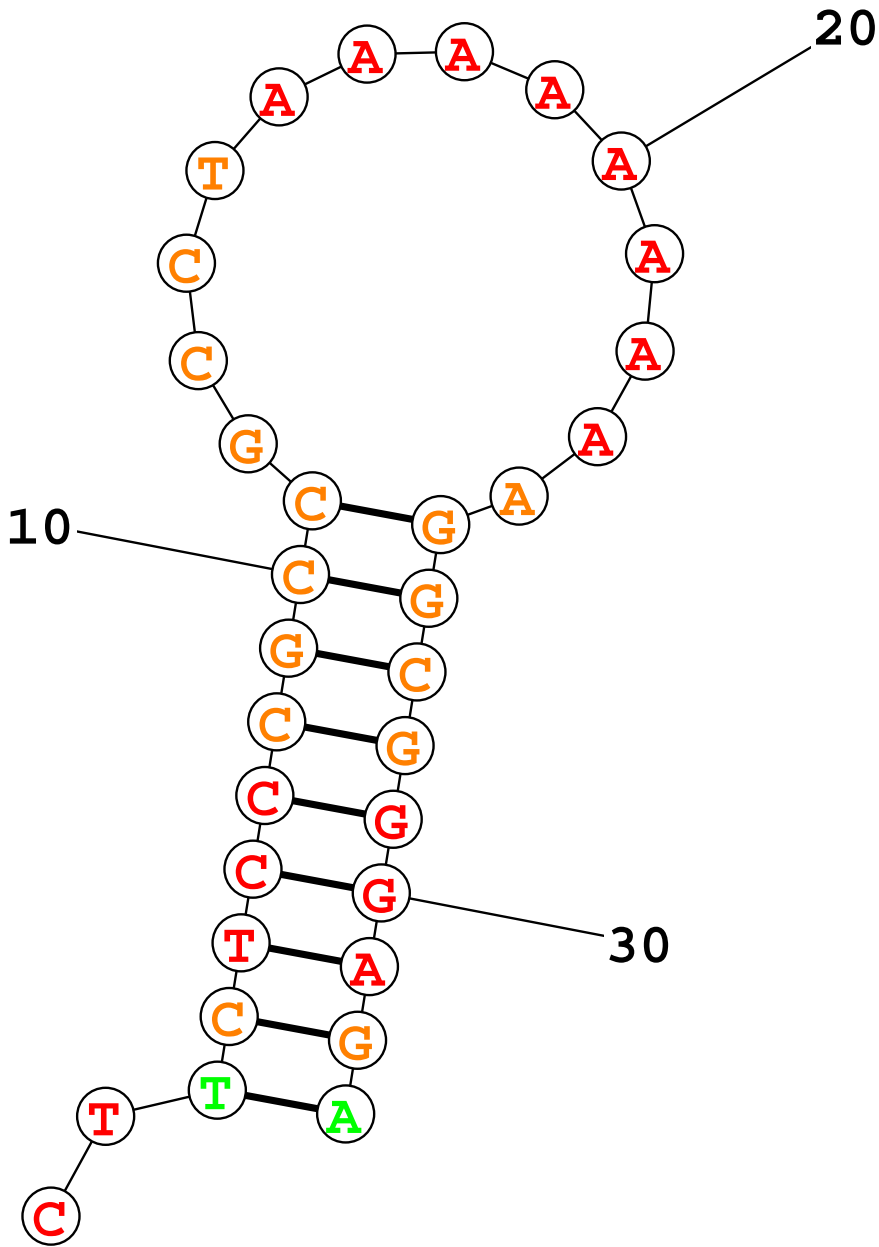

**Probability**  $\geq$  **99%**  
 99%  $>$  **Probability**  $\geq$  **95%**  
 95%  $>$  **Probability**  $\geq$  **90%**  
 90%  $>$  **Probability**  $\geq$  **80%**  
 80%  $>$  **Probability**  $\geq$  **70%**  
 70%  $>$  **Probability**  $\geq$  **60%**  
 60%  $>$  **Probability**  $\geq$  **50%**  
 50%  $>$  **Probability**

ENERGY = -11.9 OL
